# Supplementary material for: Unravelling the in vivo biotoxicity of a green-biofabricated graphene oxide–microplastic hybrid mediated by proximal intrinsic atomic interactions
Source: Royal Society of Chemistry journal article supplement (doi:10.1039/d4en00558a), 2024-12-18
Supplement: d4en00558a1.pdf [file d4en00558a1.pdf]

## Supplementary Information:

### Unravelling the in vivo biotoxicity of green-biofabricated Graphene Oxide-Microplastic hybrid mediated by proximal intrinsic atomic interaction

Adrija Sinha<sup>1</sup>, Sudakshya S. Lenka<sup>1</sup>‡, Abha Gupta<sup>1</sup>‡, Dibyangshee Singh<sup>1</sup>, Anmol Choudhury<sup>1</sup>, Shaikh Sheeran Naser<sup>1</sup>, Aishee Ghosh<sup>1</sup>, Faizan Zarreen Simnani<sup>1</sup>, Aditya Nandi<sup>1</sup>, Richa Mishra<sup>2</sup>, Suresh K. Verma<sup>1</sup>\*, Mrutyunjay Suar<sup>1</sup>\*

<sup>1</sup>School of Biotechnology, KIIT University, Bhubaneswar, Odisha, India, 751024

\*Correspondence: [sureshverma22@gmail.com](mailto:sureshverma22@gmail.com), [msuar@kiitbiotech.ac.in](mailto:msuar@kiitbiotech.ac.in)

‡authors with equal contribution.

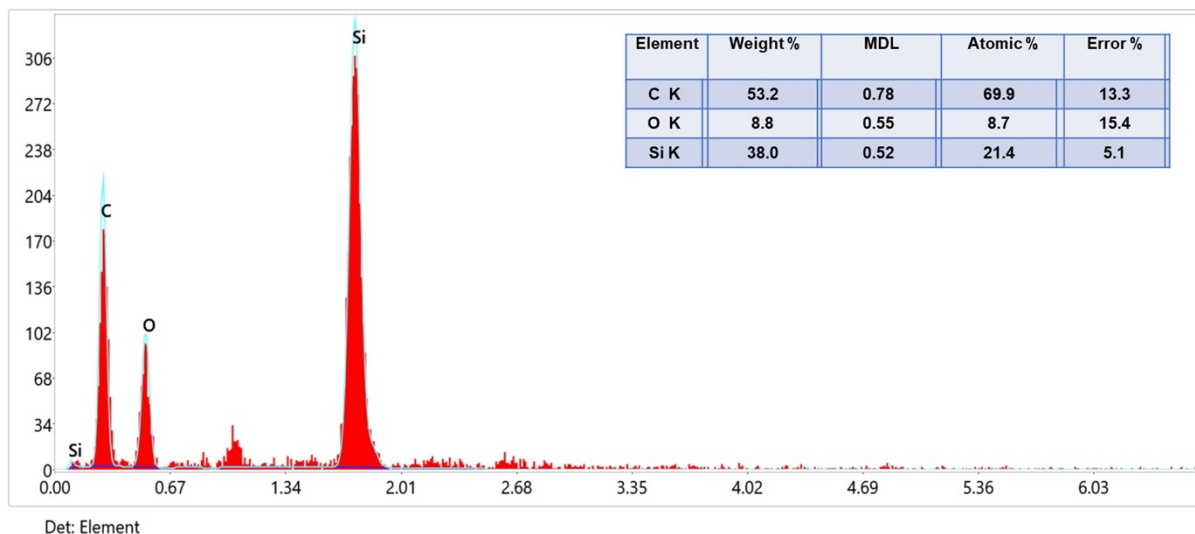

**Figure S1:** Elemental composition analysis of GO@PS determined by EDAX analysis.

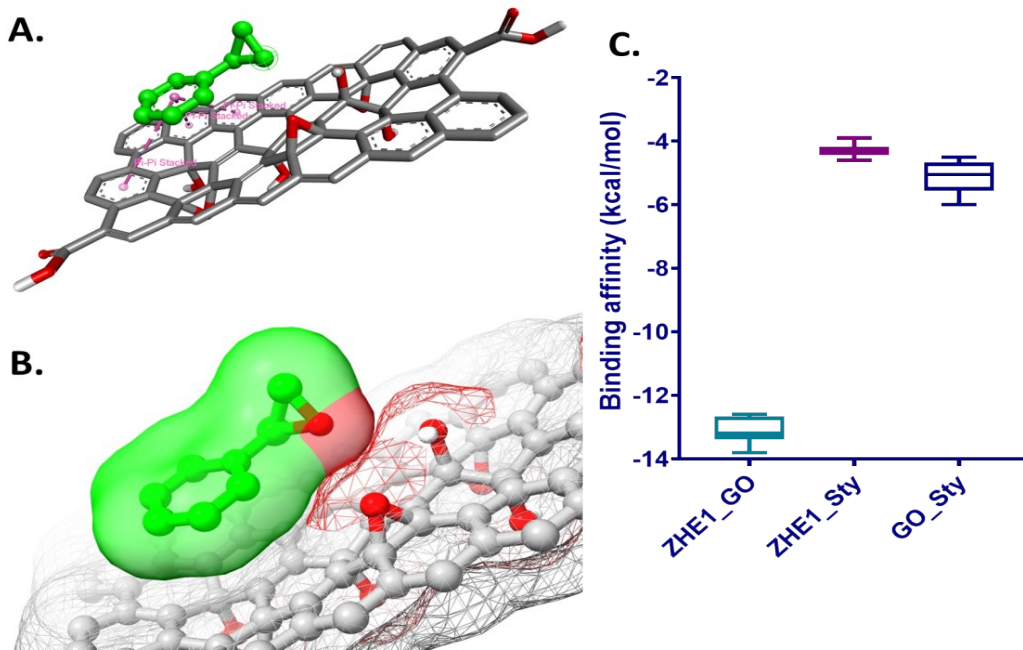

**Figure S2:** *In silico* analysis of interaction of GO and Styrene ;(A) Conformational interaction with bond (B) Confirmation interaction (C) Binding affinity of GO and Styrene.

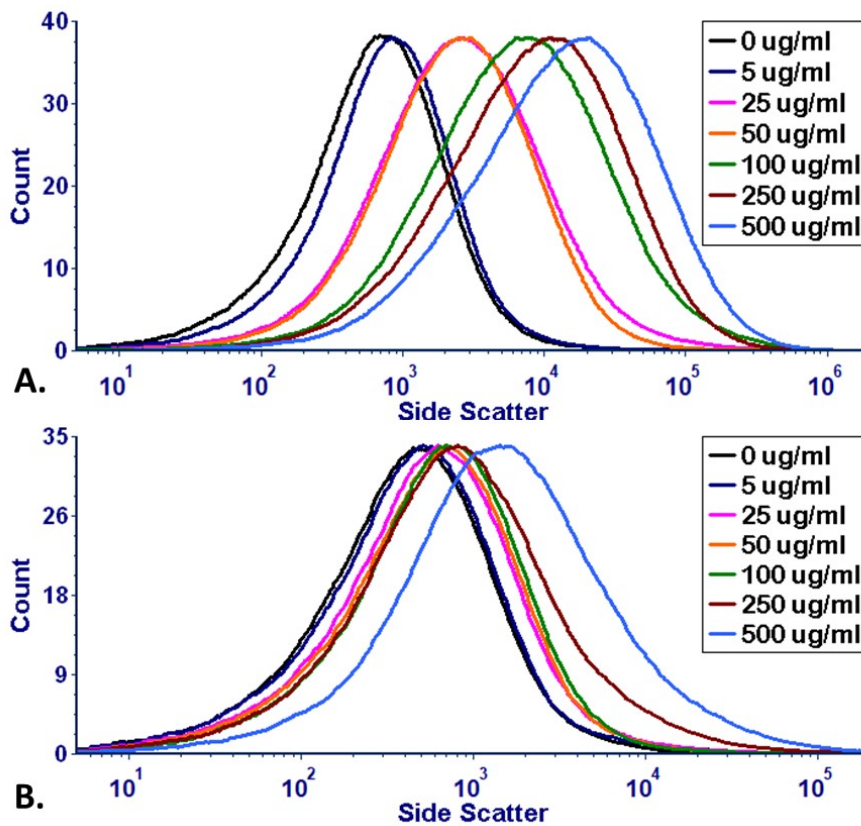

**Figure S3:** Histogram presentation of flow cytometry analysis of side scatter in zebrafish cells exposed to (A) GO (B) PS.

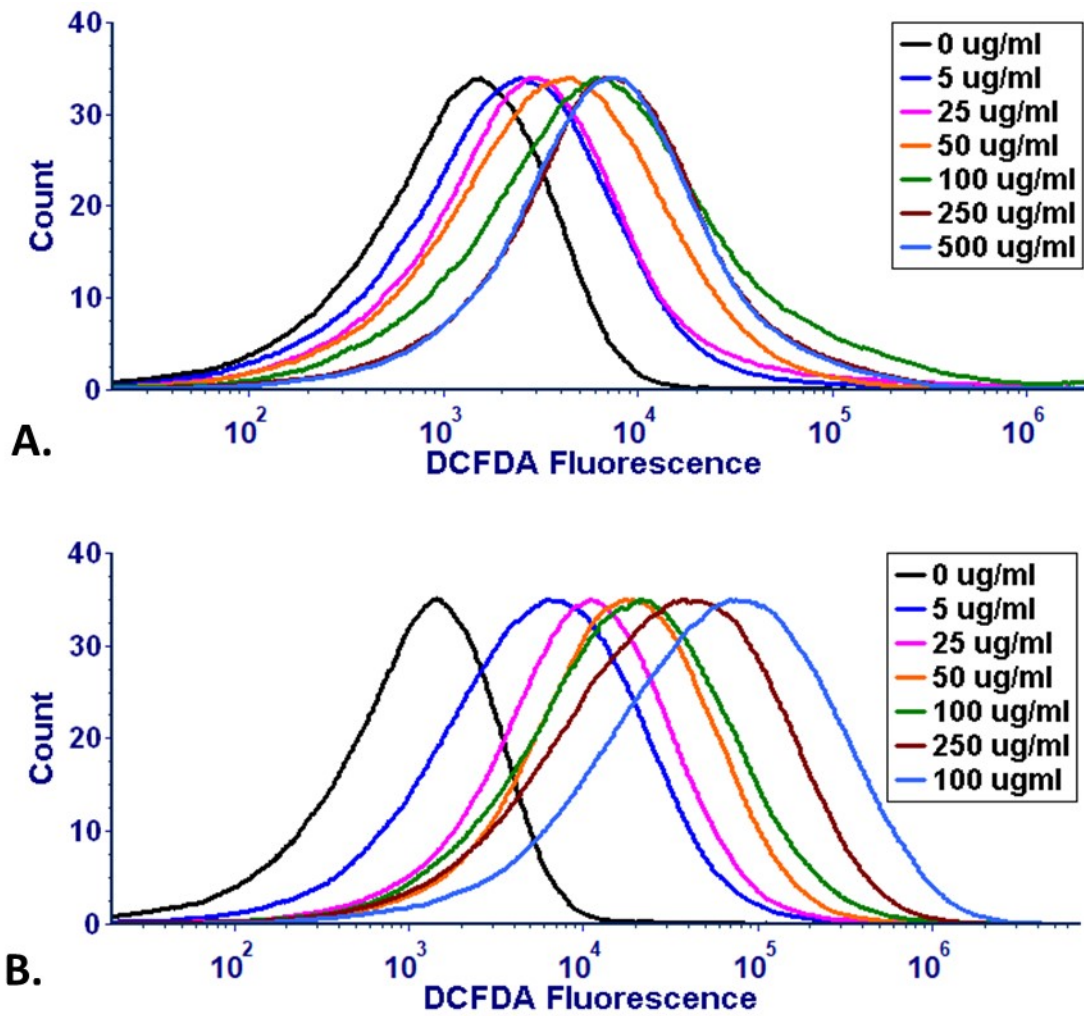

**Figure S4:** Histogram presentation of flow cytometry analysis of DCFDA fluorescence presenting oxidative stress in zebrafish cells exposed to (A) GO (B) PS.

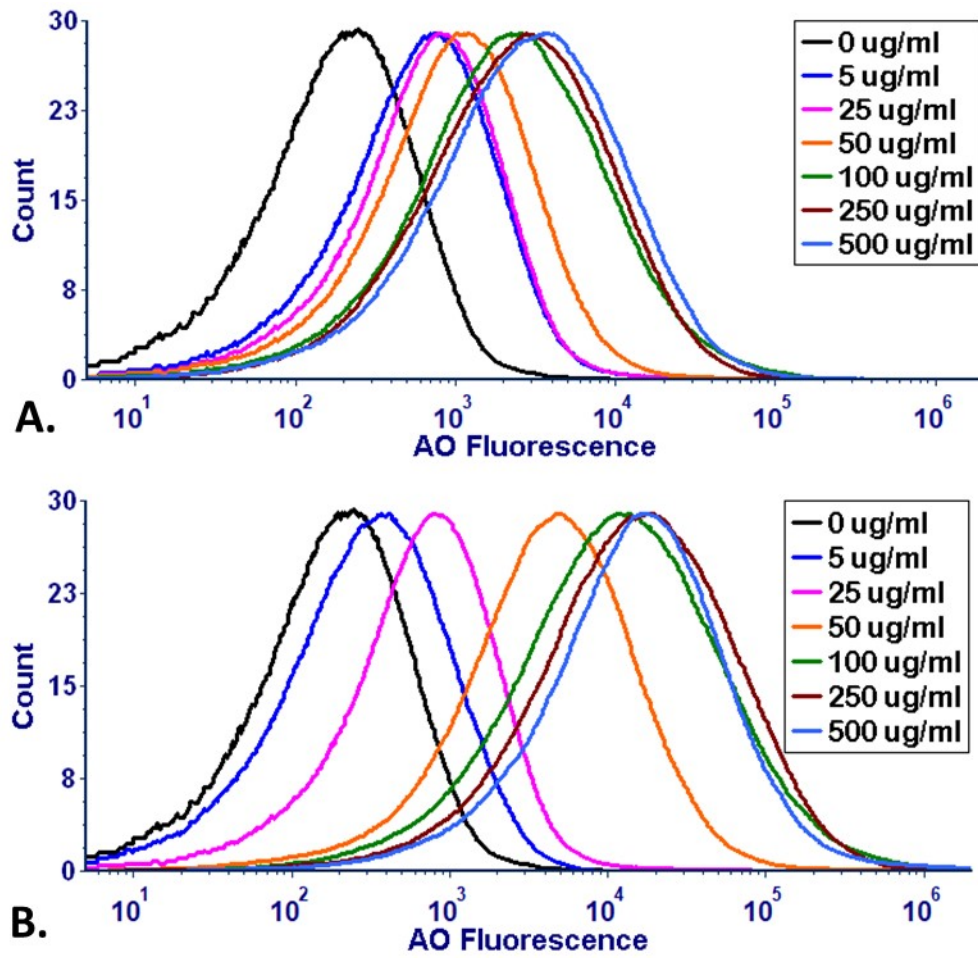

**Figure S5:** Histogram presentation of flow cytometry analysis of acridine orange fluorescence presenting apoptosis in zebrafish cells exposed to (A) GO (B) PS.

**Table S1: Interaction of industrial GO with Styrene**

| <b>MODES</b> | <b>BINDING AFFINITY (kcal/mol)</b> |
|--------------|------------------------------------|
| 1            | -6.0                               |
| 2            | -5.7                               |
| 3            | -5.5                               |
| 4            | -5.5                               |
| 5            | -5.3                               |
| 6            | -4.8                               |
| 7            | -4.7                               |
| 8            | -4.7                               |
| 9            | -4.6                               |
| 10           | -4.5                               |
